# Supplementary material for: Seasonal Changes in the Tetrodotoxin Content of the Flatworm Planocera multitentaculata
Source: PubMed Central journal article supplement (PMC5367013; doi:10.3390/md15030056), 2017-02-25
Supplement: marinedrugs-15-00056-s001.pdf [file marinedrugs-15-00056-s001.pdf]

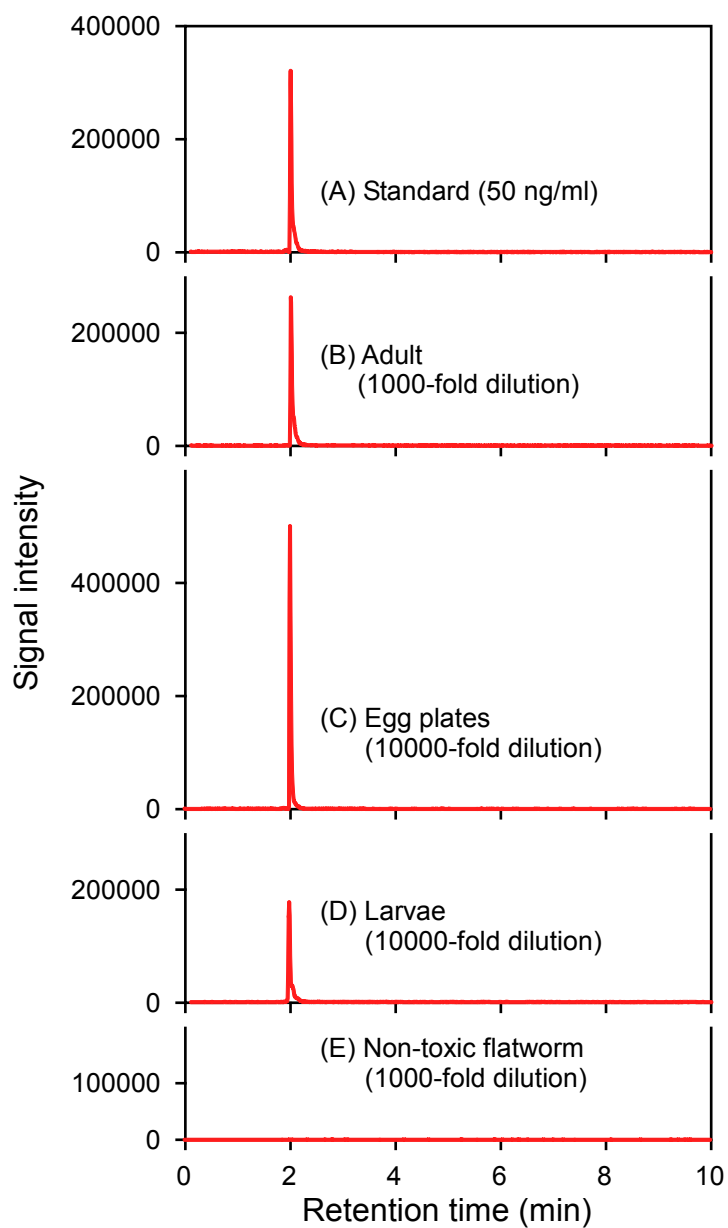

**Figure S1.** Typical mass chromatograms from LC-MS/MS (MRM mode,  $m/z$  320 > 302) of whole bodies of the flatworm *Planocera multitentaculata*. MRM patterns of 50 ng/ml TTX standard (A), extracts from adult flatworms (B), extracts from egg plates (C), extracts from larvae (D) and extract from the non-toxic flatworm *Discoplana gigas* (E).

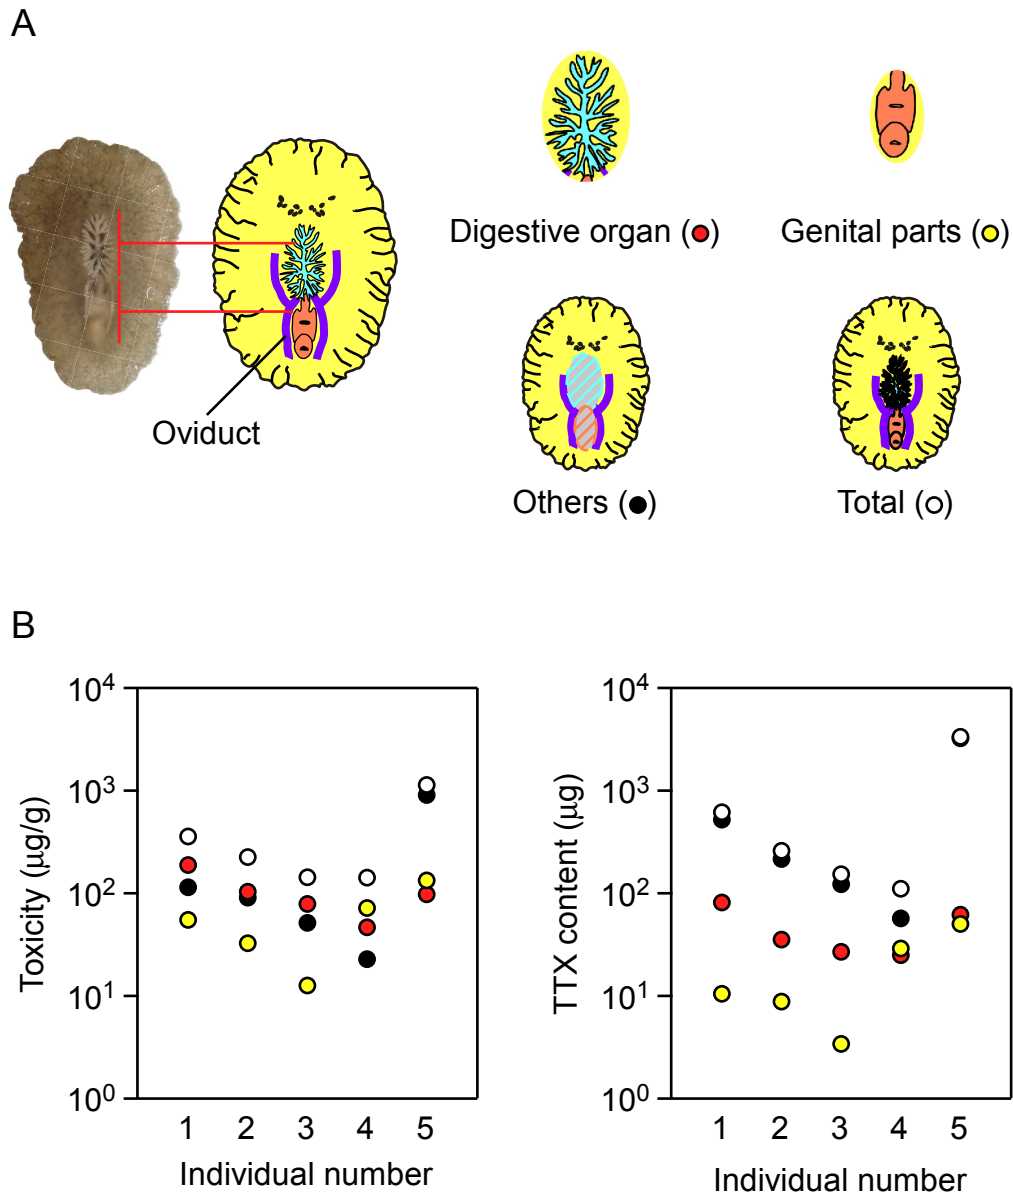

**Figure S2.** Schematic dissection of the flatworm *Planocera multitentaculata* and distribution of TTX in different body tissues. A, Flatworms were dissected into digestive organs, genitalia and remaining tissues. B, Toxicity (left panel) and TTX content (right panel) of tissues from five individuals. Red, yellow and black circles represent toxicity/TTX contents of digestive organ, genitalia and remaining tissues, respectively, whereas white circles represents TTX content of the whole body.

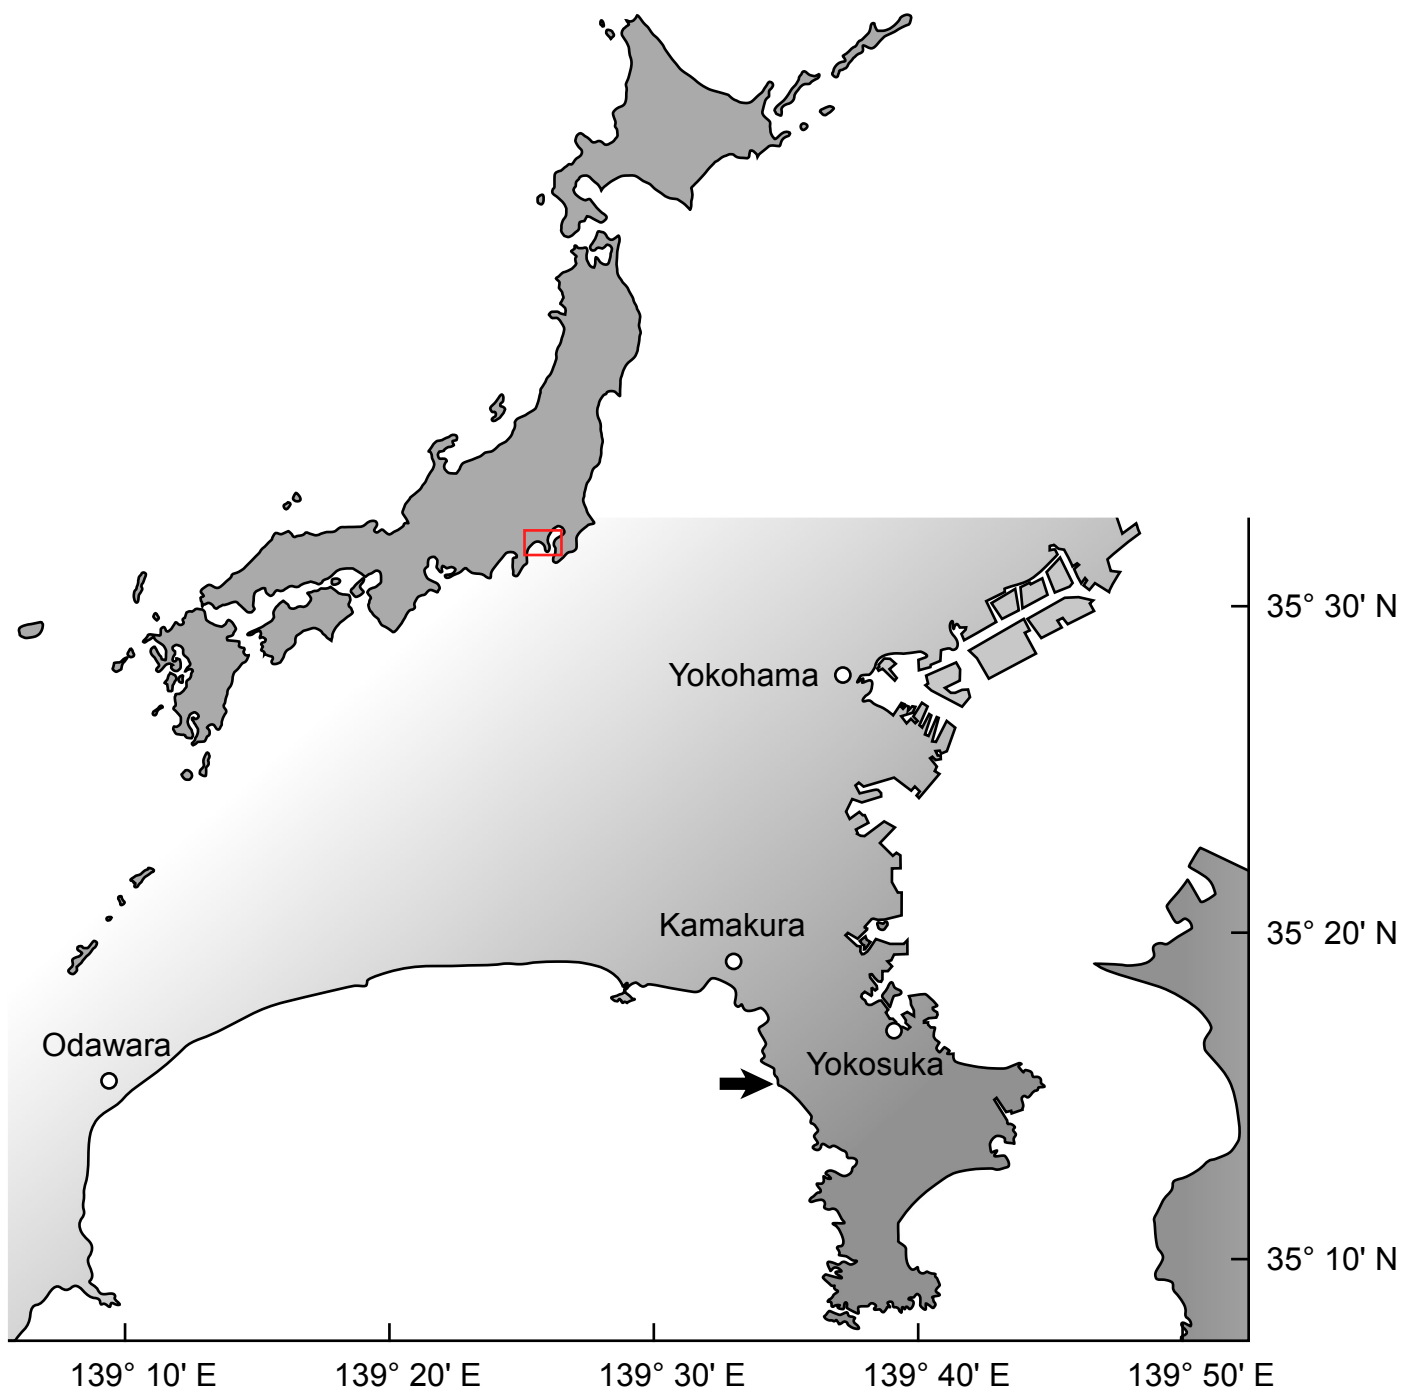

**Figure S3.** Sampling locality for the flatworm *Planocera multitentaculata*. Arrow in the map indicates the sampling site used in this study.

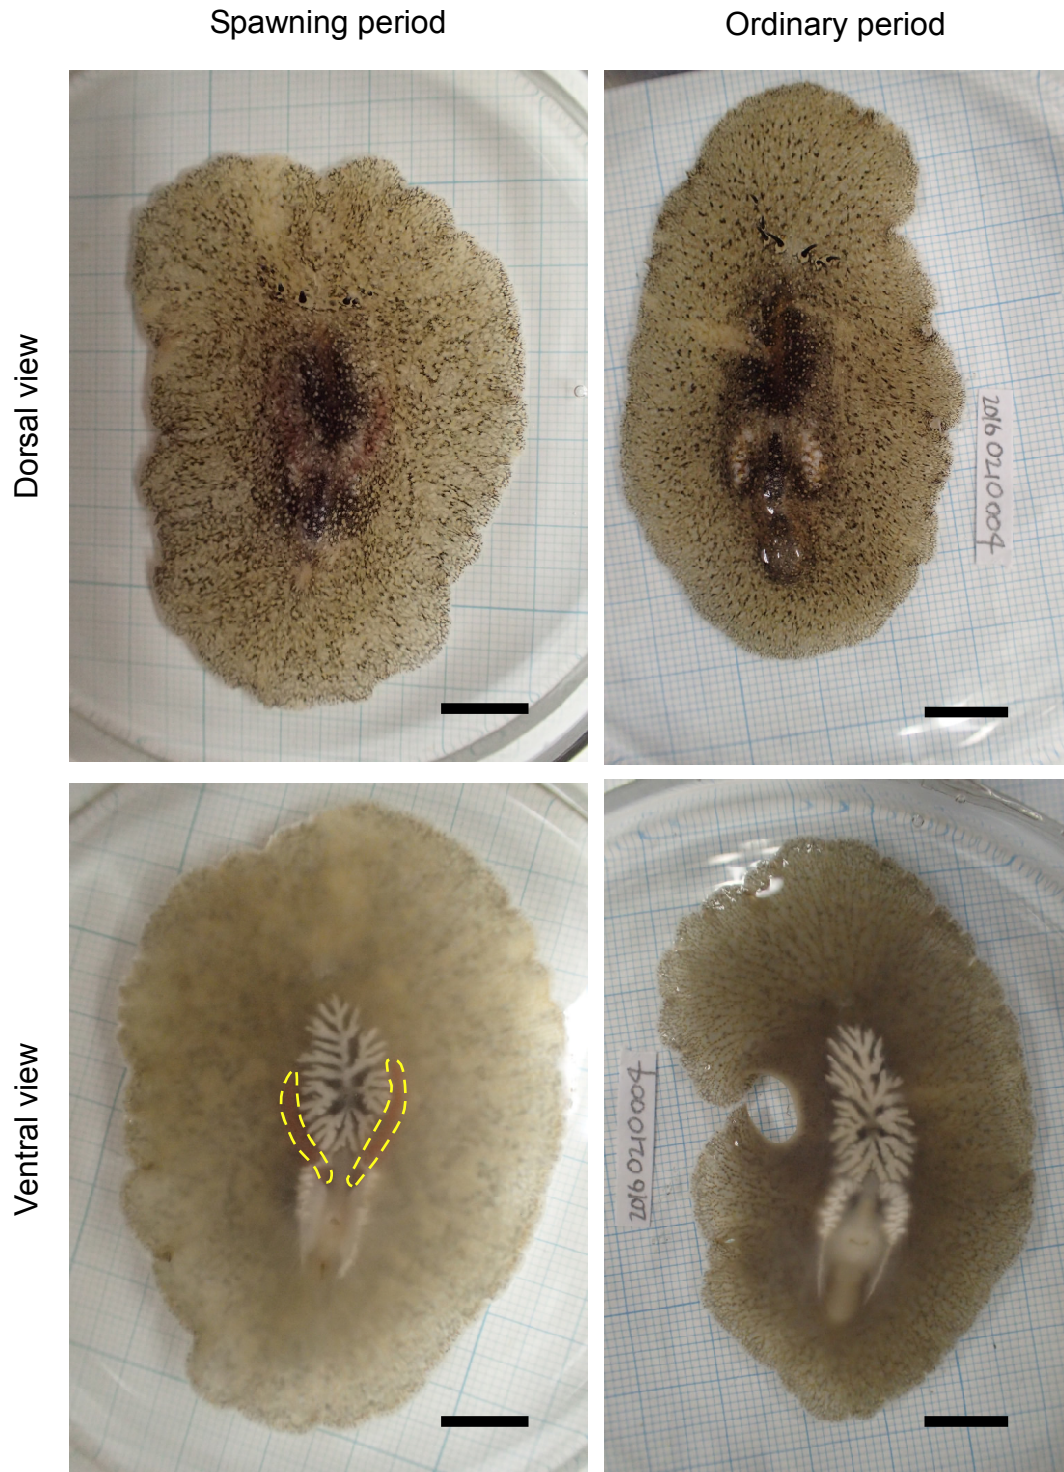

**Figure S4.** Dorsal and ventral views of the flatworm *Planocera multitentaculata*. Left and right panels show flatworms during spawning and non-spawning periods, respectively. Upper and lower panels show dorsal and ventral views of flatworms, respectively. The gonadal areas of flatworms in the spawning period are indicated by yellow dotted lines. Bars, 10 mm.

Table S1. *Planocera multitentaculata* individuals used in this study and estimation of their toxicity levels and TTX amounts <sup>a</sup>

| Collection month | No. of individuals | Body weight (g) | Toxicity ( $\mu\text{g/g}$ ) | TTX amount ( $\mu\text{g/individual}$ ) |
|------------------|--------------------|-----------------|------------------------------|-----------------------------------------|
| 2015 April       | 18                 | $2.57 \pm 0.71$ | $102 \pm 52$                 | $275 \pm 167$                           |
| May              | 2                  | $1.15 \pm 0.23$ | $20 \pm 5$                   | $24 \pm 10$                             |
| June             | 7                  | $0.99 \pm 0.33$ | $757 \pm 1404$               | $634 \pm 1127$                          |
| July             | 4                  | $0.82 \pm 0.20$ | $303 \pm 204$                | $248 \pm 161$                           |
| August           | 2                  | $0.09 \pm 0.02$ | $109 \pm 54$                 | $11 \pm 7$                              |
| September        | 2                  | $0.29 \pm 0.13$ | $144 \pm 52$                 | $49 \pm 34$                             |
| October          | 8                  | $0.54 \pm 0.16$ | $179 \pm 28$                 | $101 \pm 43$                            |
| 2016 February    | 13                 | $2.56 \pm 0.53$ | $51 \pm 12$                  | $129 \pm 33$                            |
| March            | 35                 | $2.57 \pm 0.95$ | $195 \pm 75$                 | $543 \pm 318$                           |
| April            | 22                 | $4.24 \pm 0.86$ | $159 \pm 85$                 | $730 \pm 508$                           |
| May              | 29                 | $3.09 \pm 0.64$ | $270 \pm 255$                | $874 \pm 862$                           |
| June             | 21                 | $1.89 \pm 0.54$ | $197 \pm 106$                | $357 \pm 146$                           |
| July             | 3                  | $1.79 \pm 0.01$ | $101 \pm 18$                 | $182 \pm 33$                            |
| August           | 2                  | $0.17 \pm 0.04$ | $533 \pm 7$                  | $88 \pm 17$                             |
| September        | 8                  | $0.26 \pm 0.08$ | $106 \pm 8$                  | $27 \pm 9$                              |
| October          | 20                 | $0.56 \pm 0.22$ | $179 \pm 58$                 | $98 \pm 51$                             |
| November         | 22                 | $0.95 \pm 0.46$ | $146 \pm 47$                 | $144 \pm 91$                            |
| December         | 7                  | $1.61 \pm 0.34$ | $170 \pm 70$                 | $261 \pm 101$                           |

<sup>a</sup> Data are presented as means  $\pm$  standard deviation.
